# Supplementary material
Source: PubMed Central journal article supplement (PMC6510634)

Supplemental Figure 1

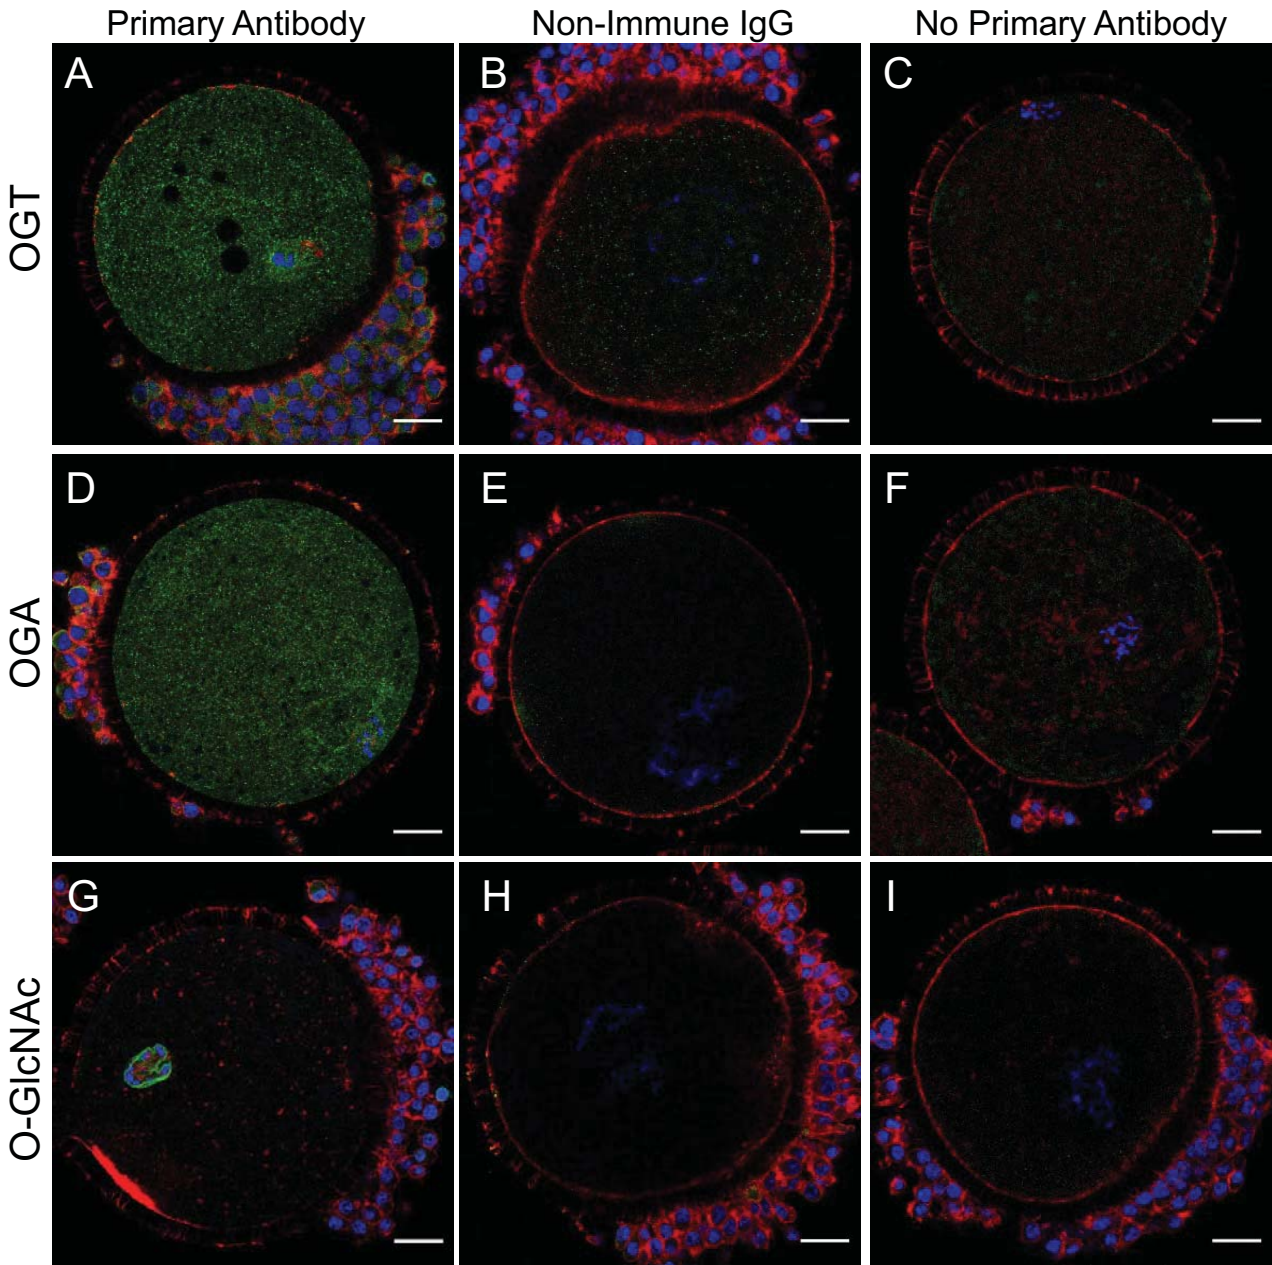

Supplemental Figure 2

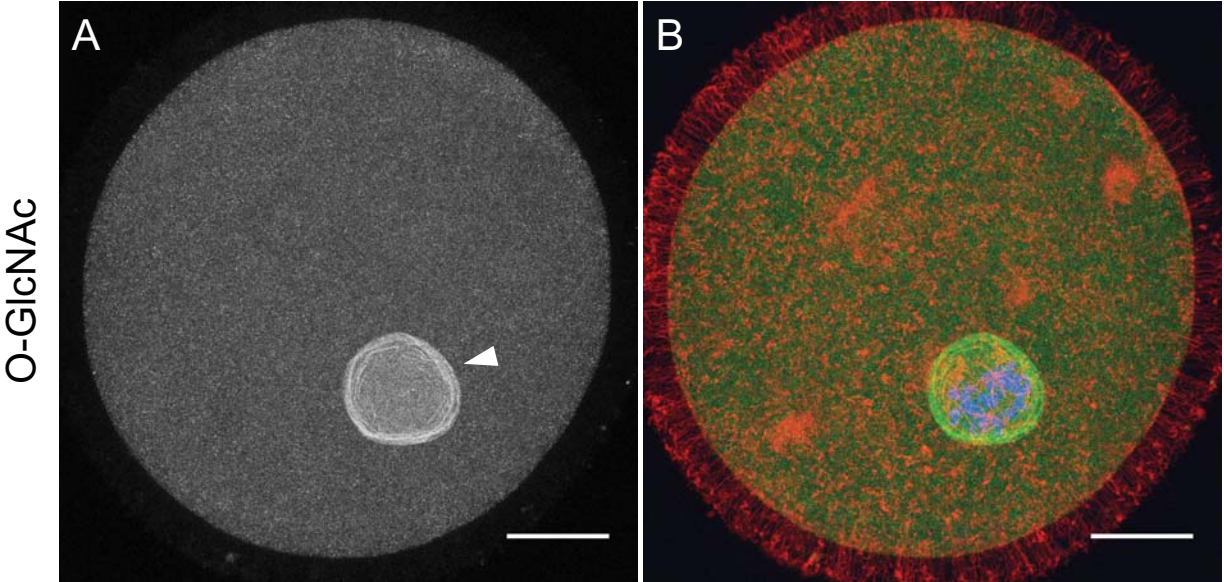

Supplement: NIHMS1011660-supplement-Supp_figS1.pdf [file NIHMS1011660-supplement-Supp_figS1.pdf]
